# Supplementary material
Source: Springer Nature journal article supplement (https://www.springermedizin.de/resource/supplementary/12916_2012_711_MOESM7_ESM.pdf/9598732)

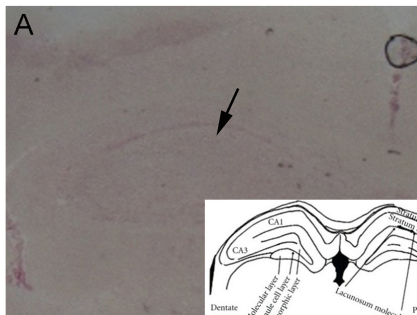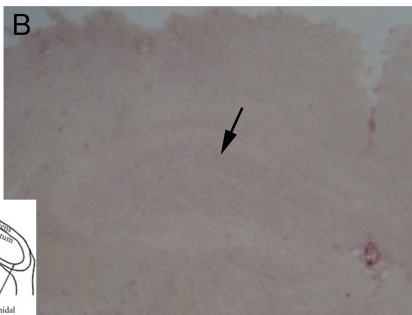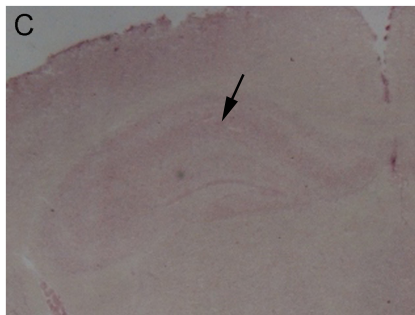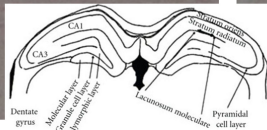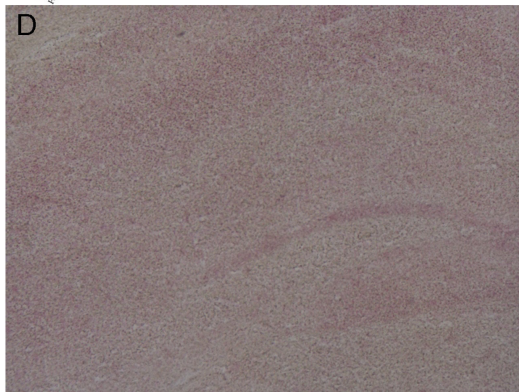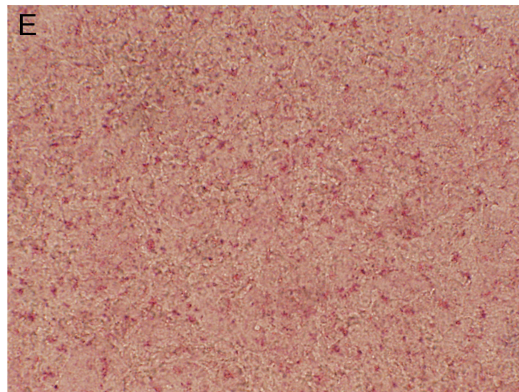

Supplement: MOESM7 [file 9598732]
